# Supplementary material for: Hydrothermal-derived carbon as a stabilizing matrix for improved cycling performance of silicon-based anodes for lithium-ion full cells
Source: publisher site journal article supplement (doi:10.3762/bjnano.9.223), 2018-09-05
Supplement: Additional file 1 [file 2190-4286-9-223-S1.pdf]

# Supporting Information

for

## Hydrothermal-derived carbon as a stabilizing matrix for improved cycling performance of silicon-based anodes for lithium-ion full cells

Mirco Ruttert<sup>1</sup>, Florian Holtstiege<sup>1</sup>, Jessica Hüsker<sup>1</sup>, Markus Börner<sup>1</sup>, Martin Winter\*<sup>1,2,§</sup> and Tobias Placke\*<sup>1,¶</sup>

Address: <sup>1</sup>University of Münster, MEET Battery Research Center, Institute of Physical Chemistry, Corrensstraße 46, 48149 Münster, Germany and <sup>2</sup>Helmholtz Institute Münster, IEK-12, Forschungszentrum Jülich GmbH, Corrensstraße 46, 48149 Münster, Germany

Email: Tobias Placke - tobias.placke@uni-muenster.de; Martin Winter - martin.winter@uni-muenster.de

\*Corresponding author

<sup>§</sup>m.winter@fz-juelich.de, Tel.: +49 251 83-36031, Fax: +49 251 83-36032

<sup>¶</sup>Tel.: +49 251 83-36826, Fax: +49 251 83-36032

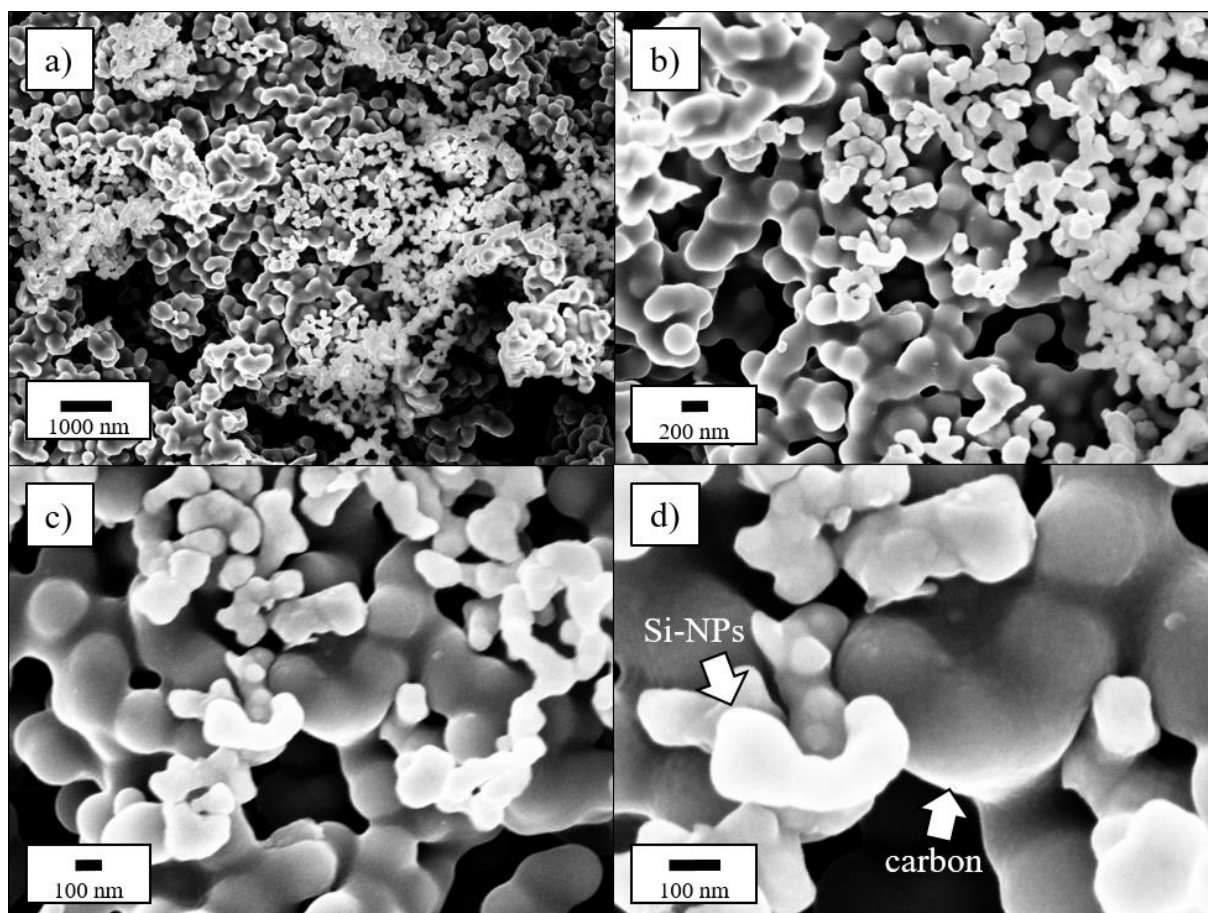

**Figure S1:** SEM micrographs of a physical mixture of the pure carbon matrix and the pure Si-NPs in a weight ratio of 80:20 in a magnification of 10k $\times$  (a), 25k $\times$  (b), 50k $\times$  (c) and 100k $\times$  (d).

**Table S1:** Overview of the tap densities of different materials used in this work.

| Sample                 | Tap density / g cm <sup>-3</sup> |
|------------------------|----------------------------------|
| Pure carbon matrix     | 0.16 $\pm$ 0.01                  |
| C:Si 90:10             | 0.19 $\pm$ 0.01                  |
| C:Si 80:20             | 0.24 $\pm$ 0.01                  |
| Physical mixture 80:20 | 0.20 $\pm$ 0.01                  |
| Pure Si-NPs            | 0.13 $\pm$ 0.01                  |

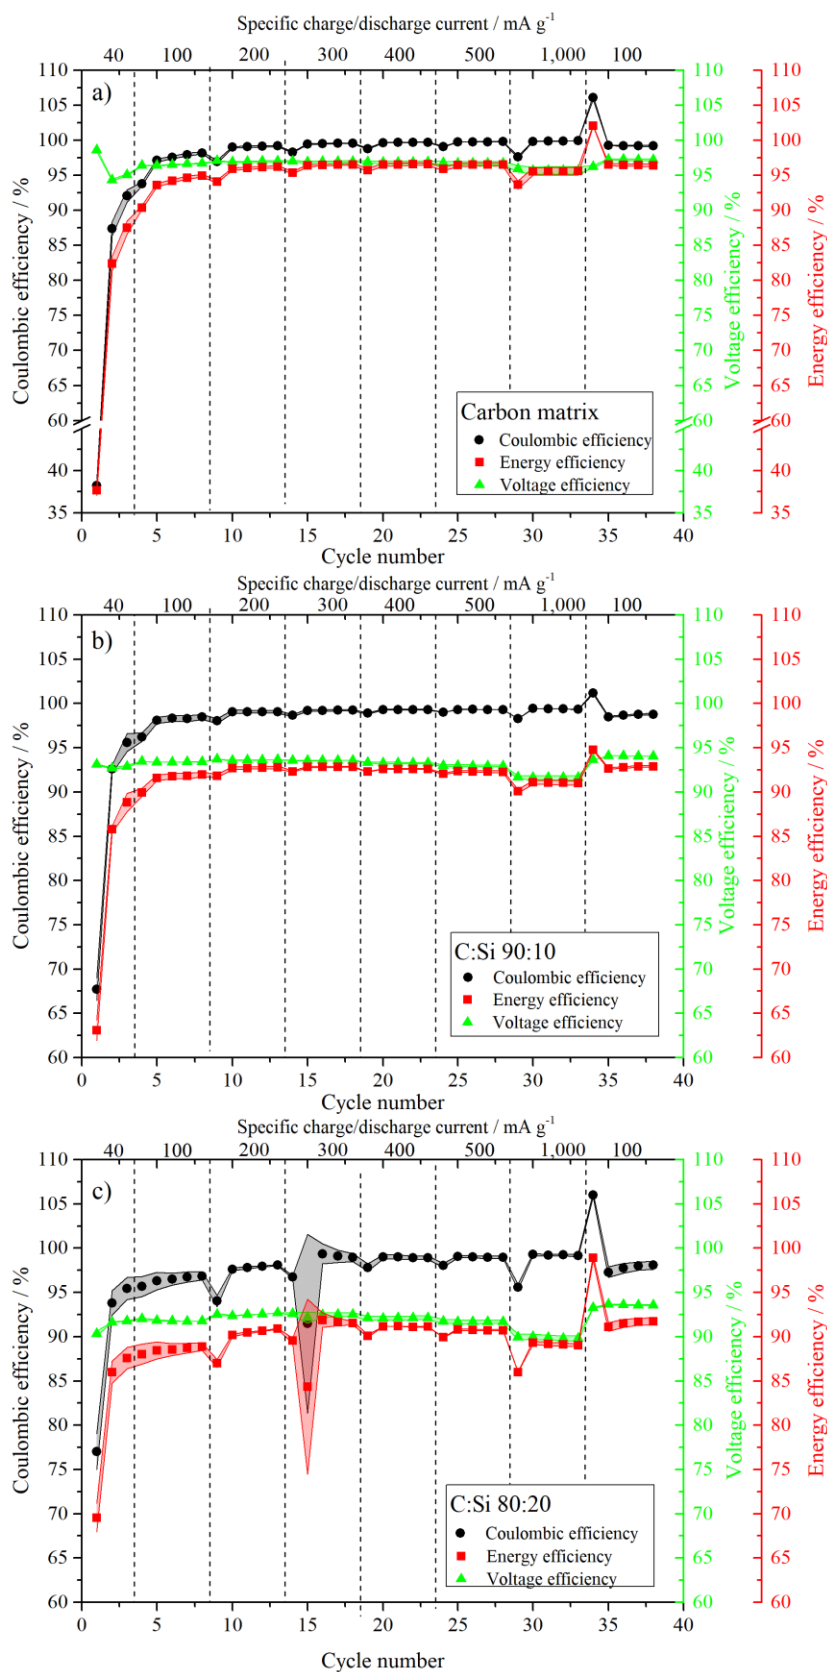

**Figure S2:** CEs, VEs and EEs of the Si/C composites with a carbon to silicon ratio of 100:0 (a), 90:10 (b), 80:20 (c) in constant current rate performance investigations at different charge/discharge currents (a). CE and RE: metallic lithium; potential range 0.02 V and 1.5 V vs Li/Li<sup>+</sup>.
